# Supplementary material for: Effect of Rearing Temperature on Growth and Microbiota Composition of Hermetia illucens
Source: PubMed Central journal article supplement (PMC7355568; doi:10.3390/microorganisms8060902), 2020-06-15
Supplement: microorganisms-08-00902-s001.pdf [file microorganisms-08-00902-s001.pdf]

Article

# Effect of rearing temperature on growth and microbiota composition of *Hermetia illucens*

Stefano Raimondi <sup>1</sup>, Gloria Spampinato <sup>1</sup>, Laura Ioana Macavei <sup>1</sup>, Linda Lugli <sup>1</sup>,  
 Francesco Candeliere <sup>1</sup>, Maddalena Rossi <sup>1,2</sup>, Lara Maistrello <sup>1,2</sup>, Alberto Amaretti <sup>1,2,\*</sup>

<sup>1</sup> Department of Life Sciences, University of Modena and Reggio Emilia, 41125 Modena, Italy

<sup>2</sup> BIOGEST – SITEIA, University of Modena and Reggio Emilia, 42124 Reggio Emilia, Italy

\* Correspondence: alberto.amaretti@unimore.it; Tel.: +39-059-205-8588

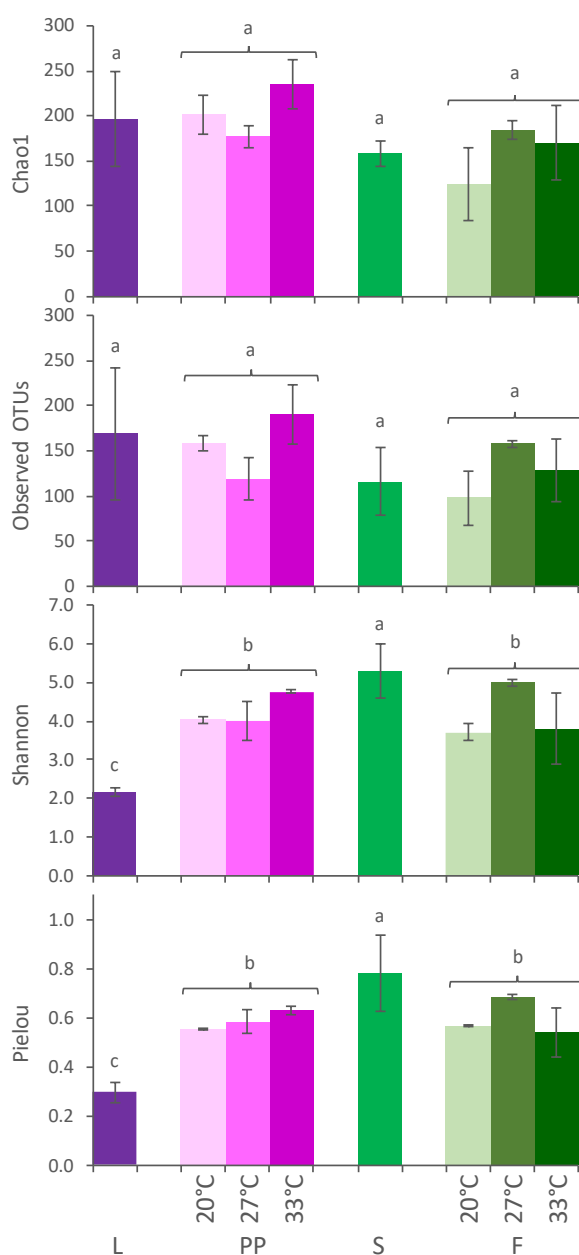

**Supplementary Figure S1.** Alpha diversity metrics of the microbiota in L, PP, S, and F. Groups significance: within each panel, values sharing the same letter do not significantly differ (Kruskal-Wallis,  $P > 0.05$ ); PP and F were grouped regardless of the rearing temperature.

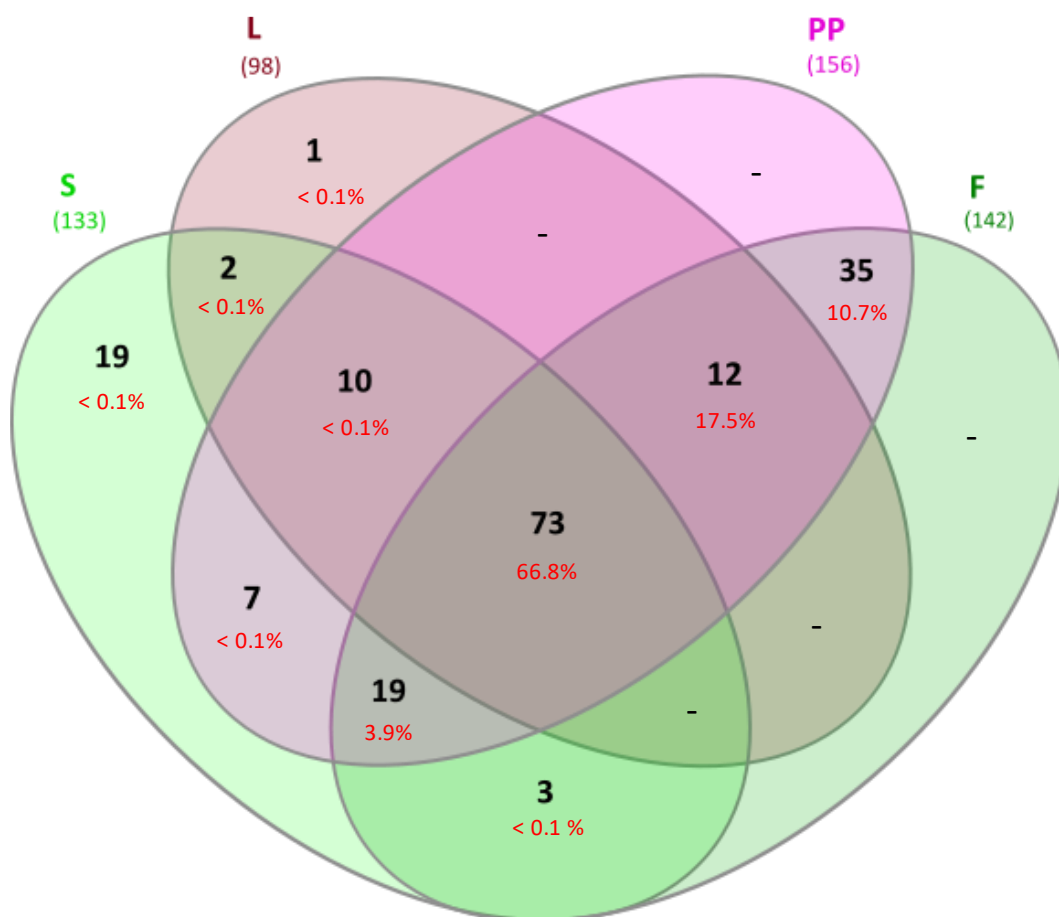

**Supplementary Figure S2.** Distribution in the main 181 OTUs (accounting for more than 0.2% in at least one sample) in L, PP, S, and F samples. For each intersection, the number of OTUs and the percentage relative to the total reads are reported in black and red, respectively.

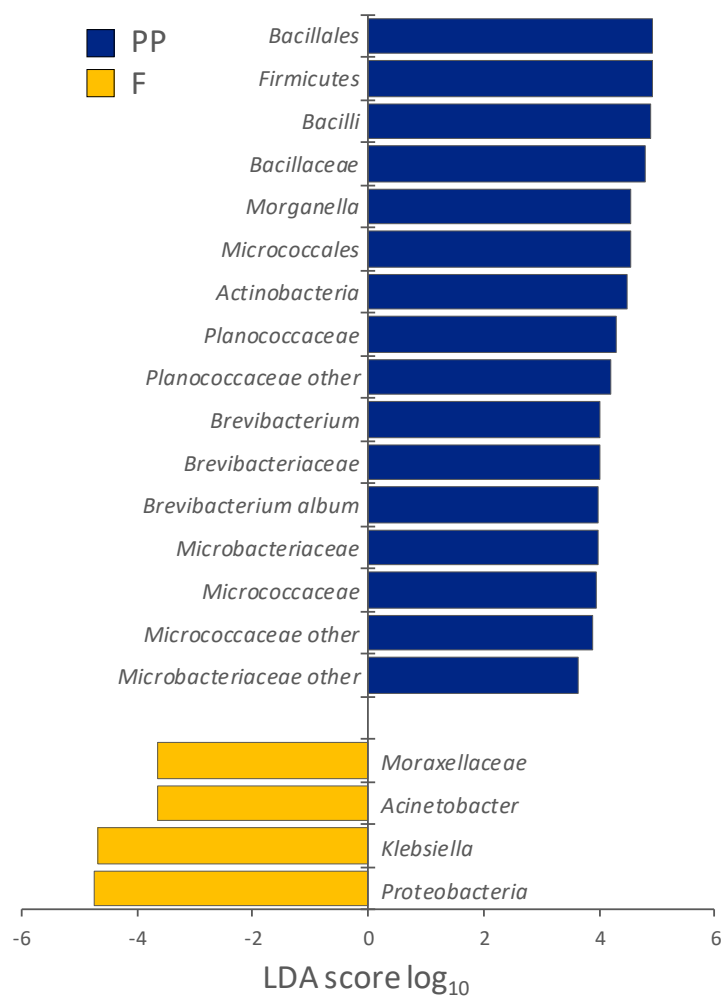

**Supplementary Figure S3.** LEfSe analysis of taxonomic features differentiating F and PP (both n = 6), regardless of the growth temperature. The plot reports LDA logarithmic scores of taxonomic biomarkers exhibiting significant differential abundance ( $P < 0.05$ , logarithmic LDA logarithmic score  $\geq 2.0$ ) and appearing at least once with abundance  $> 2.0\%$ .
